# Supplementary material
Source: publisher figshare collection journal article supplement (https://acs.figshare.com/ndownloader/files/6455694)
Supplement: Supplementary file 1 [file 6455694]

## Sheet: S8
Table S8. GO terms enrichment analysis of the downregulated proteins in LPS/nigericin versus control exosomes
Category	Term	Count	%	P Value
GOTERM_BP_DIRECT	GO:0055114~oxidation-reduction process	23	8.12721	0.000777945
GOTERM_BP_DIRECT	GO:0008152~metabolic process	19	6.71378	0.000793517
GOTERM_BP_DIRECT	GO:0007155~cell adhesion	17	6.00707	0.00349689
GOTERM_BP_DIRECT	GO:0008380~RNA splicing	16	5.65371	3.60781e-06
GOTERM_BP_DIRECT	GO:0006397~mRNA processing	16	5.65371	9.984e-05
GOTERM_BP_DIRECT	GO:0043066~negative regulation of apoptotic process	14	4.947	0.0426581
GOTERM_BP_DIRECT	GO:0045892~negative regulation of transcription, DNA-templated	14	4.947	0.044697
GOTERM_BP_DIRECT	GO:0000398~mRNA splicing, via spliceosome	11	3.88693	2.51316e-06
GOTERM_BP_DIRECT	GO:0016568~chromatin modification	11	3.88693	0.0106394
GOTERM_BP_DIRECT	GO:0042493~response to drug	8	2.82686	0.00620593
GOTERM_BP_DIRECT	GO:0030335~positive regulation of cell migration	8	2.82686	0.0337675
GOTERM_BP_DIRECT	GO:0050821~protein stabilization	7	2.4735	0.0145791
GOTERM_BP_DIRECT	GO:0006631~fatty acid metabolic process	7	2.4735	0.0342639
GOTERM_BP_DIRECT	GO:0006099~tricarboxylic acid cycle	6	2.12014	7.24502e-05
GOTERM_BP_DIRECT	GO:0042060~wound healing	6	2.12014	0.00402876
GOTERM_BP_DIRECT	GO:0051289~protein homotetramerization	6	2.12014	0.00429809
GOTERM_BP_DIRECT	GO:0000902~cell morphogenesis	6	2.12014	0.00693247
GOTERM_BP_DIRECT	GO:0006457~protein folding	6	2.12014	0.0382995
GOTERM_BP_DIRECT	GO:0045766~positive regulation of angiogenesis	6	2.12014	0.0395099
GOTERM_BP_DIRECT	GO:0006779~porphyrin-containing compound biosynthetic process	5	1.76678	4.04419e-05
GOTERM_BP_DIRECT	GO:0043044~ATP-dependent chromatin remodeling	5	1.76678	0.000441696
GOTERM_BP_DIRECT	GO:0055072~iron ion homeostasis	5	1.76678	0.00368707
GOTERM_BP_DIRECT	GO:0001889~liver development	5	1.76678	0.0190629
GOTERM_BP_DIRECT	GO:0007596~blood coagulation	5	1.76678	0.0255626
GOTERM_BP_DIRECT	GO:0006338~chromatin remodeling	5	1.76678	0.0279907
GOTERM_BP_DIRECT	GO:0006396~RNA processing	5	1.76678	0.0279907
GOTERM_BP_DIRECT	GO:0051028~mRNA transport	5	1.76678	0.0346444
GOTERM_BP_DIRECT	GO:0001503~ossification	5	1.76678	0.0470432
GOTERM_BP_DIRECT	GO:0051291~protein heterooligomerization	5	1.76678	0.0522497
GOTERM_BP_DIRECT	GO:0001501~skeletal system development	5	1.76678	0.0850202
